# Supplementary material for: The generation of HepG2 transmitochondrial cybrids to reveal the role of mitochondrial genotype in idiosyncratic drug-induced liver injury
Source: eLife. 2023 Jun 6;12:e78187. doi: 10.7554/eLife.78187 (PMC10270688; doi:10.7554/eLife.78187)
Supplement: Figure 2—source data 1. [file elife-78187-fig2-data1.xlsx]

## Sheet: fig 2A
Untreated	Oxygen consumpton rate (pmol/min/ug protein)
Parameters	Haplogroup H					Haplogroup J
Basal respiration	4.39	5.24503	5.24503	8.61063	5.32461	3.80769	4.14754	8.99553	6.96438	4.36929
Maximal respiration	4.8	6.72684	6.72684	8.71972	4.56609	3.43563	4.51807	10.2189	6.78866	2.99566
ATP-linked respiration	3.25	3.9029	3.9029	6.26877	3.92906	1.61637	2.96309	6.65278	4.74102	2.97215
Spare respiratory capacity	0.93	2.10307	2.10307	1.12866	0.369849	0.405832	0.990746	2.29349	0.946565	0.05147
Proton leak	0.62	0.75117	0.75117	1.32229	0.67539	1.51527	1.14514	1.48454	1.30307	0.709311

## Sheet: fig2B
	Oxygen consumpton rate (pmol/min/ug protein)
Complex activity	Haplogroup H					Haplogroup J
I	1.11	2.9	2.3	3.7	0.8	3.5	3.1	7.9	5.5	3.2
II	1.11	3.8	4.5	3.4	2.5	6.3	7.1	5.8	5.4	5.4
III	1.16	1.1	1.1	5.7	3.2	1.2	2.2	7.5	2.6	3.6
IV	1.73	1.8	3.9	4.4	2.9	4.8	4	3.2	5.8	3.5
