# Supplementary material for: The generation of HepG2 transmitochondrial cybrids to reveal the role of mitochondrial genotype in idiosyncratic drug-induced liver injury
Source: eLife. 2023 Jun 6;12:e78187. doi: 10.7554/eLife.78187 (PMC10270688; doi:10.7554/eLife.78187)
Supplement: Figure 3—source data 1. [file elife-78187-fig3-data1.xlsx]

## Sheet: fig3A
ATP	ATP level relative to vehicle (%)
	Haplogroup H					Haplogroup J
Concentration (uM)
0.01	117.04	117.934	72.666	113.964	102.582	137.218	105.832	108.898	110.772	108.308
0.03	133.952	137.11	81.586	117.892	110.974	157.808	109.222	106.262	114.626	101.406
0.1	173.018	136.404	76.892	104.894	111.102	137.65	111.66	105.286	122.726	98.822
0.4	89.528	203.91	72.14	104.306	110.568	202.948	104.288	98.878	118.666	104.686
1.2	105.656	162.436	72.93	105.65	109.38	134.904	100.122	99.158	118.038	92.344
3.7	121.494	174.754	70.748	95.278	108.358	129.12	96.964	93.38	112.814	90.29
11	69.172	208.78	68.898	91.972	112.46	136.752	93.218	86.866	103.138	84.03
33	67.926	72.44	51.276	79.68	90.35	111.264	68.724	76.714	86.422	64.156
75	47.564	8.9	35.61	21.198	59.752	41.104	23.278	33.04	28.036	11.328
100	32.438	6.202	14.904	30.046	49.852	63.184	16.36	33.906	23.96	8.912
300	0	0.728	0.08	0.826	3.408	1.546	0.648	1.844	2	0.292

## Sheet: fig3B
Basal respiration	Oxygen consumpton rate (pmol/min/ug protein)
Concentration (uM)	Haplogroup H					Haplogroup J
0	3.08566	3.80747	8.46503	6.04409	3.68146	3.82255	6.84837	7.7349	8.17605	4.60445
7.8	2.51674	4.55181	9.63232	5.97921	3.67788	3.68727	7.78571	9.3474	9.16591	4.22013
15.6	2.56223	4.55398	9.01183	5.17344	3.42128	4.3406	7.91276	8.82176	8.96771	4.04802
31.3	2.23048	4.36059	8.41629	4.93084	3.2078	2.27754	7.9037	10.1997	8.0827	3.85462
62.5	1.80588	4.13095	9.30613	5.04892	3.0677	1.85468	6.68647	7.30516	8.29853	4.33692
125	1.39809	3.37335	7.70404	5.88812	3.10077	1.49093	6.02038	7.83801	6.8354	3.41742
250	1.09601	1.69776	6.42671	2.57146	2.54102	0.813799	4.43571	5.61454	5.59242	2.51596
500	0.734146	1.04606	3.49274	1.23006	1.13129	0.771194	2.66741	3.72083	3.20386	1.31513

## Sheet: fig 3C
Maximal respiration	Oxygen consumpton rate (pmol/min/ug protein)
Concentration (uM)	Haplogroup H					Haplogroup J
0	3.43563	3.70962	10.2189	6.78867	2.99566	4.79726	4.06955	6.67017	8.71972	4.56609
7.8	4.1659	6.79505	11.1574	7.81395	3.25614	6.68968	6.50273	8.41573	10.4693	5.80042
15.6	4.32362	7.08876	10.5659	7.1664	3.15674	8.54622	6.33406	7.44756	10.3012	5.72179
31.3	3.96058	6.82921	10.0446	7.39878	3.25026	5.02182	5.01887	8.49608	10.0501	5.83287
62.5	3.92587	6.8546	10.6135	9.21261	3.14479	4.61801	5.1864	6.54863	10.445	6.59735
125	3.33068	5.70281	8.97554	8.93638	3.6676	4.06614	4.41826	6.37309	8.50228	5.17932
250	2.46475	3.29804	7.83261	5.00435	3.35649	3.01734	3.43922	4.93138	7.17201	4.50086
500	1.23025	2.04391	4.70136	2.52936	1.56054	1.50016	2.14192	2.97574	3.836	2.64519

## Sheet: fig 3D
ATP-linked respiration	Oxygen consumpton rate (pmol/min/ug protein)
Concentration (uM)	Haplogroup H					Haplogroup J
0	6.85	5.94203	3.78991	6.26877	3.92906	3.08566	2.8459	6.65278	4.74102	2.97215
7.8	4.93	4.5068	3.7727	6.35052	3.64718	2.51674	3.80944	5.87355	4.86399	2.98081
15.6	6.87	4.5481	3.02742	5.86081	3.46376	2.56223	3.74869	5.80652	4.04131	2.69745
31.3	3.01	3.82785	3.42426	5.37962	3.3391	2.23048	3.35466	4.95376	3.75036	2.54215
62.5	2.05	3.5734	2.48992	5.23544	3.56784	1.80588	3.20535	4.94495	4.03275	2.31903
125	2.07	2.25873	2.18769	4.40787	2.82456	1.39809	2.45631	4.19044	4.30497	2.42447
250	0.28	1.07452	1.4696	2.36452	1.68875	1.09601	1.17258	1.7777	1.13832	1.6354
500	0	0.782737	0.616449	0.135204	0.359698	0.734146	0.0875454	0.0817054	0.0600282	0.12879

## Sheet: fig 3E
Spare respiratory capacity	Oxygen consumpton rate (pmol/min/ug protein)
Concentration (uM)	Haplogroup H					Haplogroup J
0	1.81	1.30347	2.06377	1.12866	0.369849	1.38318	0.903091	2.29349	0.946565	0.05147
7.8	4.93	3.30308	3.87517	2.8308	1.57634	1.38641	2.17145	3.73071	1.82509	0.561033
15.6	8.13	4.23171	3.80735	3.08435	1.66755	1.39674	2.49584	3.48363	1.98652	0.477623
31.3	4.31	3.75538	4.36663	3.49694	1.97674	1.30942	2.43764	3.90763	2.45822	0.743753
62.5	3.68	3.65339	3.45813	3.95227	2.25597	1.24957	2.6844	4.25187	4.15043	0.566857
125	3.65	2.73896	3.36416	2.81623	1.75906	1.21718	2.29968	3.54773	3.04275	0.813799
250	3.24	2.99718	2.56437	3.09203	1.9835	1.25412	1.53603	4.6511	2.4329	0.894405
500	1.35	1.13434	1.54243	1.5062	1.32673	1.10772	0.956488	3.01759	1.2993	0.462289

## Sheet: fig 3F
Proton leak	Oxygen consumpton rate (pmol/min/ug protein)
Concentration (uM)	Haplogroup H					Haplogroup J
0	1.14	0.996118	0.846795	1.32229	0.67539	1.93802	3.43563	1.48454	1.30307	2.40082
7.8	0.72	0.84098	0.779014	1.28801	0.576896	1.39028	4.1659	1.55318	1.12488	2.89542
15.6	1.3	0.97793	0.665168	1.35608	0.590474	1.07147	4.32362	1.27572	1.13858	2.96797
31.3	0.72	0.7866	0.735846	1.17352	0.517031	1.167	3.96058	1.18319	1.19021	2.18579
62.5	0.51	0.786561	0.605389	1.25731	0.773546	1.20329	3.92587	1.41663	1.02943	2.71253
125	0.62	0.828843	0.821497	1.27818	0.595698	1.13009	3.33068	1.23736	1.58866	2.3402
250	0.98	1.1197	0.954728	1.71546	0.828606	1.84847	2.46475	1.40381	1.43313	1.94423
500	1.51	1.42151	0.965584	2.25169	0.958762	1.26585	1.23025	1.96451	1.20078	1.73598
