# Supplementary material for: The generation of HepG2 transmitochondrial cybrids to reveal the role of mitochondrial genotype in idiosyncratic drug-induced liver injury
Source: eLife. 2023 Jun 6;12:e78187. doi: 10.7554/eLife.78187 (PMC10270688; doi:10.7554/eLife.78187)
Supplement: Figure 4—source data 1. [file elife-78187-fig4-data1.xlsx]

## Sheet: Fig 4A
2-HF	ATP level relative to vehicle (%)
	Haplogroup H					Haplogroup J
Concentration (uM)
0.01	117.486	110.816	114.98	127.432	105.548	121.17	115.844	113.822	105.584	112.526
0.03	127.536	109.298	103.714	125.926	117.922	127.994	116.49	104.102	99.416	115.706
0.1	127.592	115.248	107.874	123.666	108.594	114.848	110.004	105.82	107.766	123.472
0.4	112.458	107.776	100.962	119.442	117.536	164.82	110.508	101.686	118.324	109.648
1.2	124.694	112.866	111.732	114.226	110.502	120.594	105.818	98.74	109.256	113.968
3.7	90.24	110.416	109.588	112.038	100.526	114.29	101.336	95.106	104.274	103.46
11	85.476	102.774	97.85	102.116	102.058	106.73	88.842	88.82	98.748	102.296
33	74.074	60.218	72.776	92.992	73.026	85.414	69.432	76.436	92.502	83.146
75	37.284	25.16	14.644	38.272	32.63	23.434	26.25	34.8	39.372	23.31
100	33.048	17.784	13.184	46.926	29.526	36.628	24.038	42.83	49.402	29.534
300	0	3.34	0	2.234	0.678	0	0	0.954	4.178	3.022

## Sheet: Fig 4B
Basal respiration	Oxygen consumpton rate (pmol/min/ug protein)
Concentration (uM)	Haplogroup H					Haplogroup J
0	3.8905	2.71845	5.94113	5.06255	4.30585	3.9566	5.78446	7.9513	9.4402	3.9566
7.8	3.8245	2.80533	7.95732	4.84367	4.0371	4.01771	6.73638	9.91024	12.1737	4.01771
15.6	3.77927	2.84674	6.70551	4.7118	3.99671	3.74285	5.63528	10.9627	9.42014	3.74285
31.3	3.13776	2.00032	6.00616	4.2752	3.37746	3.60351	5.45034	10.1996	9.14402	3.60351
62.5	2.5748	1.6939	5.70563	3.4557	2.64265	2.82464	5.11132	7.21682	9.68467	2.82464
125	1.44846	0.622373	3.9284	2.27454	1.98829	1.90024	3.60482	7.06285	7.01399	1.90024
250	1.62403	0.63283	2.77165	2.61523	1.10041	1.28424	2.77911	5.45846	5.76884	1.28424
500	1.26335	0.483453	2.2902	2.04324	1.1129	1.52891	2.82152	4.45161	5.40673	1.52891

## Sheet: Fig 4C
Maximal respiration	Oxygen consumpton rate (pmol/min/ug protein)
Concentration (uM)	Haplogroup H					Haplogroup J
0	5.16909	2.91546	6.47864	6.94969	4.33255	3.62229	7.08705	7.75876	9.88009	3.58158
7.8	6.20445	5.01479	7.95732	7.74574	4.09997	5.31444	9.42517	9.94152	13.0196	4.43044
15.6	5.9067	4.10599	6.9207	7.60322	4.99689	5.78045	8.98806	11.0166	10.1671	4.56514
31.3	5.18402	3.24959	6.00616	6.97857	4.50178	7.26354	9.19166	10.2274	10.084	4.80677
62.5	4.95333	3.64112	5.70563	6.44949	4.01708	3.85163	7.19595	7.23858	10.4976	4.22248
125	3.5336	1.62181	3.94065	5.04143	3.53052	3.76466	6.24519	7.06732	7.90359	3.99573
250	2.87937	1.47856	2.77165	5.04033	2.22694	1.81038	4.5232	5.46248	6.29672	2.66645
500	2.24706	0.998217	2.2902	3.74039	1.95942	1.7122	3.93578	4.46307	5.63208	2.81282

## Sheet: Fig 4D
ATP-linked respiration	Oxygen consumpton rate (pmol/min/ug protein)
Concentration (uM)	Haplogroup H					Haplogroup J
0	3.04	4.14114	3.70483	6.25645	3.36214	3.01986	2.35915	3.72855	2.43758	3.55416
7.8	3.13	4.76187	4.01451	7.21152	3.35959	3.43885	3.03575	4.06981	3.31331	3.33653
15.6	5.38	4.2224	4.0126	5.44023	3.21436	3.02565	2.53063	3.36713	2.88442	3.32042
31.3	4.53	3.8312	3.74408	4.61822	3.0773	2.55802	1.73403	2.78204	2.96056	2.75546
62.5	2.13	3.15935	2.62154	4.54397	2.28254	1.96988	1.35876	2.30862	2.12969	2.08245
125	1.13	1.99987	1.99699	2.45647	1.45613	1.022	0.445957	0.849883	1.41377	1.37837
250	0.07	1.33713	1.35341	1.78784	0.840146	0.61283	0.303248	0.307181	1.32464	0.516253
500	0.06	1.46896	1.33758	1.95312	1.02619	0.611576	0.315327	0.579741	1.01993	0.531307

## Sheet: Fig 4E
Spare respiratory capacity	Oxygen consumpton rate (pmol/min/ug protein)
Concentration (uM)	Haplogroup H					Haplogroup J
0	1.05	1.7142	3.43927	2.32506	0.042461	1.11558	0.289689	1.82988	2.10657	0.236184
7.8	2.98	3.27958	5.25946	4.28557	0.593272	2.14648	2.09894	2.92145	2.89813	0.667398
15.6	4.13	3.74964	6.39778	3.64985	0.820929	1.97328	1.31831	2.71646	2.86587	0.992494
31.3	5.25	4.24061	5.97241	4.54046	1.19958	1.95835	1.42811	2.59414	2.67782	1.13332
62.5	4.61	3.73493	4.13442	4.80549	1.38979	2.28593	1.91127	2.69342	2.98086	1.55816
125	2.8	3.46974	4.57843	4.4052	2.09532	1.92471	0.956478	2.43932	2.76553	1.5375
250	1.43	2.45285	3.59234	3.40683	1.38221	1.51608	0.812683	1.73996	2.4251	1.08656
500	1.37	1.95427	2.65973	2.50342	1.28391	1.00647	0.474787	1.02033	1.68859	0.842182

## Sheet: Fig 4F
Proton leak	Oxygen consumpton rate (pmol/min/ug protein)
Concentration (uM)	Haplogroup H					Haplogroup J
0	0.44	0.736924	0.614662	1.29858	0.594452	1.31444	0.958981	0.920205	2.62497	0.753619
7.8	0.52	0.842035	0.667549	1.52246	0.658126	0.976499	0.696672	0.966053	1.5343	0.708969
15.6	0.83	0.760776	0.606234	1.07702	0.529846	1.00124	0.630928	0.837114	1.85293	0.683985
31.3	0.9	0.71654	0.51093	0.925346	0.529885	0.745245	0.387647	0.629983	1.34018	0.623165
62.5	0.56	0.685237	0.482621	1.14818	0.550145	0.772353	0.472552	0.703589	1.33894	0.574331
125	0.4	0.594523	0.491894	1.04192	0.444274	0.59654	0.257941	0.651439	0.862131	0.614649
250	0.49	0.638219	0.516734	1.10205	0.444093	0.753423	0.374463	0.724509	1.29059	0.624126
500	1.71	0.963504	0.465755	1.17553	0.502724	0.665463	0.286319	0.735664	1.03186	0.608007
