# Supplementary material for: The generation of HepG2 transmitochondrial cybrids to reveal the role of mitochondrial genotype in idiosyncratic drug-induced liver injury
Source: eLife. 2023 Jun 6;12:e78187. doi: 10.7554/eLife.78187 (PMC10270688; doi:10.7554/eLife.78187)
Supplement: Figure 5—source data 1. [file elife-78187-fig5-data1.xlsx]

## Sheet: Fig 5A
Tolcapone	ATP level relative to vehicle (%)
	Haplogroup H					Haplogroup J
Concentration (uM)
0.01	119.406	116.49	119.684	111.082	108.396	87.268	107.83	112.262	108.752	97.95
0.03	137.978	129.561	121.43	125.924	116.884	71.562	113.12	112.758	100.176	102.698
0.1	158.846	110.293	93.364	111.78	124.164	72.894	108.202	108.03	103.034	104.092
0.4	157.068	85.8766	128.476	106.316	116.374	73.472	110.828	108.448	98.486	105.498
1.2	182.276	86.1977	124.992	111.898	119.36	64.346	108.26	101.674	101.638	89.96
3.7	182.112	78.733	123.772	108.218	107.614	72.738	99.764	103.636	91.512	83.93
11	169.268	70.0432	117.01	110.526	99.628	79.352	89.894	95.968	84.046	76.512
33	127.742	75.9747	99.378	82.42	81.608	39.85	78.52	83.372	68.818	68.67
75	77.352	55.8308	80.502	71.92	75.066	37.018	62.63	67.218	52.138	49.038
100	49.408	51.687	56.988	52.702	40.676	28.638	33.246	48.854	39.994	29.954
300	3.706	10.0681	3.32	7.734	11.512	-1.952	5.572	4.658	8.042	3.668

## Sheet: Fig 5B
Basal respiration	Oxygen consumpton rate (pmol/min/ug protein)
Concentration (uM)	Haplogroup H					Haplogroup J
0	4.21742	1.82924	6.35234	4.8862	3.94551	3.60042	4.79971	7.95493	8.42895	3.90525
7.8	7.51811	7.94403	9.20159	9.31874	7.84096	3.60042	7.63422	11.9363	14.5065	7.08835
15.6	10.0798	10.263	9.55235	11.8391	8.73642	11.3445	10.8933	12.6762	14.3707	13.2535
31.3	11.5638	11.6153	8.87801	14.7359	10.2445	12.9637	10.4561	14.3707	11.3677	14.3707
62.5	8.64764	3.87388	6.6102	15.0074	10.1208	8.21999	6.57777	10.0765	6.7532	8.82921
125	4.82386	2.44661	3.44255	9.53745	5.88679	2.85088	3.71311	4.99022	3.36391	7.45154
250	2.2113	0.957386	1.54849	3.2277	4.27504	0.606261	1.93887	2.76006	1.47857	4.60198
500	1.64808	0.439198	0.728876	2.59407	4.16278	0.495495	1.23592	0.974345	0.902745	4.47356

## Sheet: Fig 5C
Maximal respiration	Oxygen consumpton rate (pmol/min/ug protein)
Concentration (uM)	Haplogroup H					Haplogroup J
0	5.95498	1.81873	6.47026	5.72379	2.71993	4.65126	6.40277	8.01824	8.51899	4.42259
7.8	7.82159	3.96334	9.21956	12.5156	5.20865	4.39586	10.0833	12.0009	14.5356	9.40097
15.6	7.62966	4.10769	9.60442	12.9722	4.98128	3.7399	10.4316	12.7198	14.4202	10.8464
31.3	6.73549	3.61576	8.8782	11.9263	4.95144	2.64208	8.23654	9.83857	11.3677	9.09785
62.5	4.81779	3.19141	6.6102	9.81488	4.89576	3.71864	6.84622	10.1047	6.7532	6.80831
125	2.55971	1.47787	3.44255	6.49736	2.6123	1.27029	3.80917	4.99022	3.36392	5.61225
250	1.47515	0.572357	1.54849	2.13218	2.19461	0.355073	1.91902	2.76006	1.47857	3.0824
500	1.3384	0.240098	0.728876	1.71938	2.66523	0.307532	1.42656	0.974345	0.902745	3.52161

## Sheet: Fig 5D
ATP-linked respiration	Oxygen consumpton rate (pmol/min/ug protein)
Concentration (uM)	Haplogroup H					Haplogroup J
0	0.83	3.74095	4.48899	6.3296	3.31523	3.18097	1.98162	3.80893	3.78807	3.14527
7.8	0.57	2.61042	3.93172	4.19735	1.74262	2.93644	1.73405	3.29772	2.26351	4.45049
15.6	0.32	2.12067	2.95891	4.42698	0.776786	2.37768	1.23689	2.80073	0.966378	4.50674
31.3	0.16	1.80536	1.50997	4.74681	0.80465	2.81465	0.774714	3.85498	1.53393	5.09499
62.5	0.39	1.65844	1.46548	3.95647	0.821796	2.83235	0.589001	3.63577	2.55254	4.55209
125	0.68	2.73839	3.04521	5.89612	1.33225	2.30297	0.550598	3.44148	2.26412	2.95567
250	0.33	2.06625	3.62559	2.93628	1.37315	1.52784	0.299921	2.94698	0.905939	1.95851
500	0.56	0.94983	0.615509	1.39328	1.23053	0.789524	0.208059	0.80364	0.76972	1.37668

## Sheet: Fig 5E
Spare respiratory capacity	Oxygen consumpton rate (pmol/min/ug protein)
Concentration (uM)	Haplogroup H					Haplogroup J
0	0.53	1.19756	2.34481	1.15257	0.762874	0.768444	0.341748	1.87233	0.797098	0.0626017
7.8	0.36	2.31125	2.35504	4.24619	2.28377	1.97471	1.35016	2.66186	3.1322	0.754637
15.6	0.17	0.74649	1.07366	0.569864	1.17243	0.818044	0.705203	1.11065	1.07159	0.384738
31.3	0	0	0.0958604	0	0	0	0.059938	0	0	0
62.5	0	0	0	0	0	0	0.0866658	0	0	0
125	0	0	0	0	0	0	0	0	0	0
250	0	0	0	0	0	0	0	0	0	0
500	0	0	0	0	0.0313637	0	0	0	0	0

## Sheet: Fig 5F
Proton leak	Oxygen consumpton rate (pmol/min/ug protein)
Concentration (uM)	Haplogroup H					Haplogroup J
0	0.971849	1.05513	1.18445	1.1384	0.592694	1.01963	0.987281	0.803596	1.13862	1.11668
7.8	5.72694	5.90951	5.71416	6.09208	5.37459	5.90443	5.60256	3.78338	7.11989	6.81001
15.6	9.3327	9.67743	9.07877	10.0222	8.89715	8.92938	8.5694	5.72757	11.0512	10.0093
31.3	10.6592	11.694	9.16393	12.7288	10.085	12.0502	12.5784	12.4625	13.2224	10.4658
62.5	9.63297	9.43689	11.6428	9.2408	8.01534	10.7814	10.4488	8.12216	12.4429	11.779
125	5.63033	5.09528	6.21149	4.56022	6.11929	5.70541	5.86349	4.60623	7.27882	5.23117
250	2.69756	2.20291	3.14577	1.70826	3.23864	2.37833	2.17758	1.83264	2.32176	2.98058
500	1.74006	1.36738	0.982438	0.994708	3.24303	1.25632	1.30376	0.830619	1.82435	1.114
