# Supplementary material for: The generation of HepG2 transmitochondrial cybrids to reveal the role of mitochondrial genotype in idiosyncratic drug-induced liver injury
Source: eLife. 2023 Jun 6;12:e78187. doi: 10.7554/eLife.78187 (PMC10270688; doi:10.7554/eLife.78187)
Supplement: Figure 6—source data 1. [file elife-78187-fig6-data1.xlsx]

## Sheet: Fig 6A
Complex I activity	Oxygen consumpton rate (pmol/min/ug protein)
Concentration (uM)	Haplogroup H					Haplogroup J
0	1.9	3	3.7	3.2	3	3.4	9.4	6.8	4.9	5.8
15	1.3	3.2	3.1	4	3.8	3.2	7.9	6.9	4.8	4.2
30	1.41	2.7	3.1	3.1	3.9	3.2	7.1	5.6	4.3	4.8
125	1.32	3	2.5	2.9	2.8	2.5	4.5	5.6	3.4	3.9
250	0.76	2.1	2.5	2.2	2	2.1	3.5	4.5	2.1	2.5
Complex II activity	Oxygen consumpton rate (pmol/min/ug protein)
Concentration (uM)	Haplogroup H					Haplogroup J
0	2.01	2.3	4.2	3.1	3.9	3.3	4.4	4.9	4.3	5.3
15	2.1	2.1	2.1	2.1	3	4.2	5.4	3.3	3.3	3.3
30	2.1	1.6	1.7	1.7	2.8	3.1	3.3	5.4	3.3	3.1
125	2.1	1.4	1.7	1.8	2.2	2.4	6.6	3.2	2.9	2.5
250	2.1	1	3.1	1.2	3.3	2	6.9	2.1	2.7	2.7

## Sheet: Fig 6B
Complex I activity	Oxygen consumpton rate (pmol/min/ug protein)
Concentration (uM)	Haplogroup H					Haplogroup J
0	2.51	2.8	3.5	3.3	3.2	2.8	10.2	6.7	4.4	4.3
15	1.52	3.7	3.9	3.8	3.6	3.6	9	8.1	4.7	5.9
30	1.85	3.1	4	4	3.1	3.8	8.6	7.6	5.2	4.6
125	1.57	2.4	3.2	3.1	2.7	3.4	7.5	5.8	3.1	4.1
250	0.94	2.1	1.4	2.4	1.7	1.9	6.2	4.2	1.7	2.5
Complex II activity	Oxygen consumpton rate (pmol/min/ug protein)
Concentration (uM)	Haplogroup H					Haplogroup J
0	1.97	1.9	5.1	2.6	5	5.9	5.4	4	3.8	4
15	0.95	2.3	3.5	2.6	4.2	4.4	5.8	3.8	3.8	3.1
30	0.65	1.9	4.7	2.6	4.1	4.6	5.4	3.2	3.6	2.1
125	0.36	1.4	2.7	1.9	2.3	3.1	3.4	1.8	2.6	1.9
250	0.25	0.8	1.3	1.6	1	1.7	3.7	0.7	0.9	0.9
