# Supplementary material for: The generation of HepG2 transmitochondrial cybrids to reveal the role of mitochondrial genotype in idiosyncratic drug-induced liver injury
Source: eLife. 2023 Jun 6;12:e78187. doi: 10.7554/eLife.78187 (PMC10270688; doi:10.7554/eLife.78187)
Supplement: Figure 7—source data 1. [file elife-78187-fig7-data1.xlsx]

## Sheet: S5
The effect of bicalutamide upon Haplogroup H and Haplogroup J transmitochondrial cybrids
ATP	ATP level relative to vehicle (%)
Concentration (μM)	Haplogroup H					Haplogroup J
0.01	87.146	84.08	108.888	78.866	115.402	85.074	107.426	117.188	97.452	100.534
0.03	88.64	73.112	111.672	74.32	104.744	85.732	109.976	119.394	92.87	85.23
0.1	105.47	88.426	113.792	72.09	104.398	77.104	107.154	116.654	93.108	91.854
0.4	107.092	81.074	106.818	70.018	99.914	78.718	106.57	108.432	88.88	89.75
1.2	128.75	104.18	102.174	65.39	105.228	82.17	104.054	102.69	85.096	85.084
3.7	99.278	100.914	101.592	63.872	100.51	77.24	97.32	104.672	81.356	74.498
11	77.896	101.918	86.31	56.372	97.122	78.078	91.062	99.78	75.748	73.9
33	82.014	91.654	93.104	56.162	92.852	68.962	90.272	98.242	68.598	66.576
75	63.052	77.248	88.256	44.414	90.578	62.396	73.93	96.758	61.856	58.228
100	81.774	85.466	48.204	48.284	81.284	57.54	84.214	90.934	53.672	66.172
300	82.448	77.704	53.834	52.348	79.752	14.224	55.636	76.86	42.314	48.044
Basal OCR	Oxygen consumpton rate (pmol/min/μg protein)
Concentration (μM)	Haplogroup H					Haplogroup J
0	3.16	3.02	7.08	5.21	3.72	4.38	5.91	7.82	7.06	4.38
7.8	2.6	3.85	1.08	5.47	3.62	4.06	6.6	9.14	9.14	4.06
15.6	3.36	4.37	1.17	5.22	3.97	3.84	6.225	8.56	8.67	3.83
31.3	3.61	4.76	7.6	5.12	4.01	4.3	6.31	8.24	8.4	4.3
62.5	2.81	4.35	7.9	5.34	3.25	4.32	6.6875	9.06	9.05	4.32
125	3.64	4.55	7.44	5.02	3.79	3.81	5.6325	7.37	7.54	3.81
250	3.17	1.7	6.04	4.84	3.38	3.68	5.44	8.02	6.38	3.68
500	2.34	3.24	5.07	3.95	2.77	3.56	4.4625	5.36	5.37	3.56
Maximal OCR	Oxygen consumpton rate (pmol/min/μg protein)
Concentration (μM)	Haplogroup H					Haplogroup J
0	3.88	3.52	7.98	5.53	3.26	2.44	5.405	7.89	7.1	4.19
7.8	3.81	5.3	8.71	7.05	3.24	2.57	6.475	9.15	9.14	5.04
15.6	4.56	7.15	8.16	6.9	4.12	2.14	6.05	8.57	8.66	4.83
31.3	5.12	7.17	8.67	6.99	4.77	2.51	4.98	3.26	8.53	5.62
62.5	3.88	6	9.14	7.71	3.05	2.17	6.6	9.09	9.14	6
125	4.87	6.05	8.54	6	4.32	2.05	5.4025	7.37	7.55	4.64
250	3.7	3.54	6.95	5.35	3.47	1.74	5.11	8.05	6.39	4.26
500	2.68	2.5	5.51	4.4	2.91	1.38	3.9725	5.37	5.37	3.77
ATP-linked respiration	Oxygen consumpton rate (pmol/min/μg protein)
Concentration (μM)	Haplogroup H					Haplogroup J
0	1.74	3.52667	4.17	5.25	3.59	3.18333	1.32	5.03	3.71	3.2
7.8	1.15	3.54667	4.62	6.08	3.41	3.37667	2.61	4.66	4.25	2.86
15.6	1.14	3.36667	3.96	5.67	3.29	3.35333	2.42	4.43	3.83	3.21
31.3	1.6	3.57333	3.92	5.47	3.65	3.69	3.38	4.37	3.88	3.32
62.5	1.37	3.45667	4.36	5.38	3.62	3.55333	3.4	4.36	4.31	2.9
125	1.24	3.08667	3.37	4.87	3.15	3.58667	3.39	4.37	3.58	3
250	0.9	2.69	4.09	4.17	3	3.07	2.56	4.03	3.47	2.62
500	0.71	2.40333	2.83	3.62	2.88	2.54333	2.13	3.4	2.93	2.1
Spare respiratory capacity	Oxygen consumpton rate (pmol/min/μg protein)
Concentration (μM)	Haplogroup H					Haplogroup J
0	0.2	1.24333	2.7	0.83	0.17	0.983333	0.56	1.86	0.53	0.04
7.8	0	1.55333	3.66	1	1.16	2.03667	1.73	2.81	1.57	0.29
15.6	0.26	2.04667	3.9	1.98	0.98	2.14333	2.74	2.64	1.05	0.27
31.3	0	1.92667	3.65	2.13	1.3	2.49	2.36	3.22	1.89	0.81
62.5	1.39	2.54667	3.89	2.36	1.67	2.40667	1.6	3.61	2.01	0.66
125	0.43	1.74333	3.1	1.7	0.83	1.93	1.44	3.01	1.34	0.54
250	0.33	1.56	3.06	1.29	0.58	1.33	1.5	1.77	0.72	0.22
500	0.68	1.12667	1.85	0.85	0.27	0.553333	0.17	0.95	0.54	0.28
Proton leak	Oxygen consumpton rate (pmol/min/μg protein)
Concentration (μM)	Haplogroup H					Haplogroup J
0	0.3	0.703333	0.74	1.02	0.79	1.09667	1.75	1.09	1.5	0.7
7.8	0.36	0.723333	0.87	1.17	0.64	1.07333	1.28	1.23	1.23	0.76
15.6	0.37	0.646667	0.72	1.01	0.56	1.02667	2	1.09	1.22	0.77
31.3	0.51	0.703333	0.7	0.94	0.66	0.99	1.43	1.07	1.21	0.69
62.5	0.47	0.86	0.84	1.4	0.71	1.04333	1	1.17	1.39	0.57
125	0.23	0.62	0.69	0.98	0.65	1.00333	1.22	1.15	1.07	0.79
250	0.23	0.613333	0.9	0.93	0.68	1.07	0.95	1.15	1.3	0.76
500	0.28	0.613333	0.69	0.89	0.67	1.01333	1.15	1.16	1.19	0.69
