# Supplementary material for: The generation of HepG2 transmitochondrial cybrids to reveal the role of mitochondrial genotype in idiosyncratic drug-induced liver injury
Source: eLife. 2023 Jun 6;12:e78187. doi: 10.7554/eLife.78187 (PMC10270688; doi:10.7554/eLife.78187)
Supplement: Figure 8—source data 1. [file elife-78187-fig8-data1.xlsx]

## Sheet: S6
The effect of entacapone upon Haplogroup H and Haplogroup J transmitochondrial cybrids
ATP	ATP level relative to vehicle (%)
Concentration (μM)	Haplogroup H					Haplogroup J
0.01	110.938	116.024	118.16	112.38	110.426	137.13	111.026	109.464	100.534	99.918
0.03	97.368	106.06	109.388	116.036	114.15	143.28	121.62	104.114	111.024	105.546
0.1	149.262	103.044	112.42	120.436	125.934	124.384	115.322	106.996	103.918	91.976
0.4	104.454	113.552	112.49	114.468	122.61	121.122	116.842	107.154	110.206	93.302
1.2	120.624	106.452	119.868	114.91	120.952	132.246	113.542	99.926	102.924	87.948
3.7	109.732	96.134	104.97	111.748	114.568	135.73	112.672	97.394	102.006	84.932
11	119.04	136.932	109.358	78.978	114.564	130.952	109.908	95.412	100.334	86.118
33	98.722	91.252	99.876	106.738	97.164	117.382	108.098	87.872	93.76	80.164
75	89.702	79.56	90.62	94.636	93.932	87.956	101.99	85.01	85.97	69.922
100	81.568	73.746	57.384	95.74	80.06	84.44	94.592	80.406	79.99	89.634
300	56.646	65.304	43.422	70.42	59.168	54.436	73.984	57.258	43.862	52.94
Basal OCR	Oxygen consumpton rate (pmol/min/μg protein)
Concentration (μM)	Haplogroup H					Haplogroup J
0	5	4.28	5.64	5	4.82	5.44	5.39	5	5	6.17
7.8	5.07	4.75	5.13	5.38	4.29	5.12	5.45667	5.08	6.17	5.12
15.6	6.25	5.69	5.75	5.78	6.14	5.25	5.76333	5.88	6.16	5.25
31.3	6.94	5.54	6.21	6.65	6.17	5.32	5.99	5.86	6.79	5.32
62.5	7.1	6.07	6.79	8.38	7.87	6.14	7.16667	6.4	8.96	6.14
125	10.04	6.79	10.52	12.35	11.18	8.51	7.81	5.76	9.16	8.51
250	10.81	6.14	10.57	13.57	12.89	11.5	7.35	4.69	5.82	11.54
500	8.82	2.25	6.21	6.92	4.57	6.39	3.64	1.85	2.68	6.39
Maximal OCR	Oxygen consumpton rate (pmol/min/μg protein)
Concentration (μM)	Haplogroup H					Haplogroup J
0	3.84	3.28	8.12	5.83	3.39	2.86	6.3575	9.87	8.16	4.54
7.8	376	4.13	9.06	8.12	3.56	3.09	7.37	10.04	9.88	6.47
15.6	4.66	3.73	9.44	8.84	4.34	3.82	8.0275	11.61	10.05	6.63
31.3	5.4	4.47	10.37	11.01	3.72	2.83	8.1625	11.6	10.89	7.33
62.5	4.73	4.68	10.24	14.16	4.88	3.34	9.6525	12.67	14.36	8.24
125	5.69	4.57	12.92	14.1	5.77	2.85	9.7675	11.38	14.73	10.11
250	5.27	3.53	11.6	12.4	6.43	2.72	7.7725	9.26	9.33	9.78
500	4.38	1.19	7.3	6.48	3.1	1.94	3.7975	3.65	4.3	5.3
ATP-linked respiration	Oxygen consumpton rate (pmol/min/μg protein)
Concentration (μM)	Haplogroup H					Haplogroup J
0	4.97	5.695	5.26	6.13	3.81	1.07	2.29	4.56	3.54	3.21
7.8	4.98	5.31	4.5	6.12	3.84	0.96	2.24	4.18	4.14	2.93
15.6	4.72	5.235	4.86	5.61	3.83	1.31	2.53	4.15	3.75	3.56
31.3	4.155	4.515	4.19	4.84	3.47	0.85	2.13	3.79	3.65	3.37
62.5	3.865	4.4	3.8	5	2.73	0.66	1.48	3.24	2.92	3.76
125	3.15	3.755	3.22	4.29	2.01	0.45	1.06	3.54	2.69	4.26
250	2.415	3.245	2.54	3.95	0.88	0.38	0.27	2.83	0.72	3.68
500	2.165	2.65	1.42	3.88	0.45	0.09	0.21	1.43	0.39	0.61
Spare respiratory capacity	Oxygen consumpton rate (pmol/min/μg protein)
Concentration (μM)	Haplogroup H					Haplogroup J
0	1.73667	2.085	3.76	1.04	0.41	1.07	0.66	2.52	0.91	0.23
7.8	2.87333	3.11	4.37	2.4	1.85	0.96	1.11	3.7	2.73	0.78
15.6	3.36667	3.595	5.32	2.91	1.87	1.31	0.9	3.99	3.4	0.9
31.3	4.10667	4.035	5.55	4.25	2.52	0.85	1.17	4.63	4.31	0.82
62.5	4.18	3.76	5.02	5.02	2.5	0.66	0.75	3.32	5.71	1.27
125	2.24	2.165	1.92	2.39	2.41	0.45	0.27	2.36	1.73	0.28
250	0.0333333	0.05	0	0	0.1	0.38	0.07	0	0.73	0.06
500	0.1	0.15	0	0	0.3	0.08	0	0.07	0.24	0
Proton leak	Oxygen consumpton rate (pmol/min/μg protein)
Concentration (μM)	Haplogroup H					Haplogroup J
0	0.856667	0.775	0.84	1.02	0.71	3.84	1.12	1.03	1.46	0.72
7.8	1.11	0.98	1.18	1.37	0.78	3.76	0.89	1.16	1.25	0.85
15.6	1.30333	1.185	1.43	1.54	0.94	4.66	1.2	1.3	2.05	1.27
31.3	1.67	1.6	1.86	1.81	1.34	5.44	1.56	1.5	3.05	1.48
62.5	3.67667	3.345	3.84	4.34	2.85	4.73	2.71	3.68	5.53	2.43
125	6.7	5.965	6.24	8.17	5.69	5.69	3.5	7.86	9.69	4.53
250	10.3333	9.73	9.92	11.54	9.54	5.27	3.92	11.92	13.12	6.45
500	4.98333	4.79	4.12	5.37	5.46	4.38	1.3	8.09	6.93	3
