# Supplementary material for: The generation of HepG2 transmitochondrial cybrids to reveal the role of mitochondrial genotype in idiosyncratic drug-induced liver injury
Source: eLife. 2023 Jun 6;12:e78187. doi: 10.7554/eLife.78187 (PMC10270688; doi:10.7554/eLife.78187)
Supplement: Figure 9—figure supplement 1—source data 1. [file elife-78187-fig9-figsupp1-data1.xlsx]

## Sheet: S1
Cell doubling time
	Supplemented with pyruvate				Without uridine and pyruvate
HepG2 WT	28.8	26.2	24		28.6	27.6	29.9
HepG2 rho zero	31.2	33.3	36.5		0	0	0
