# Supplementary material for: The generation of HepG2 transmitochondrial cybrids to reveal the role of mitochondrial genotype in idiosyncratic drug-induced liver injury
Source: eLife. 2023 Jun 6;12:e78187. doi: 10.7554/eLife.78187 (PMC10270688; doi:10.7554/eLife.78187)
Supplement: Supplementary file 2. — Each dataset was analyzed using a linear mixed model with the subject fitted as a random effect and the haplogroup fitted as a fixed effect as described in the statistical analysis section. Key to the data presented in each tab: 2 a - accompanying analysis for Figure 2; Basal mitochondrial function and respiratory complex activity in haplogroup H and J HepG2 cybrids. 2b - accompanying analysis for Figure 3; The effect of flutamide on ATP levels and mitochondrial respiratory function in haplogroup H and J HepG2 cybrids. 2 c - accompanying analysis for Figure 4; The effect of 2-hydroxyflutamide upon ATP levels and mitochondrial respiratory function in haplogroup H and J HepG2 cybrids. 2d - accompanying analysis for Figure 5; The effect of flutamide and 2-hydroxyflutamide upon respiratory complex I and II in haplogroup H and J HepG2 cybrids. 2e - accompanying analysis for Figure 6; The effect of tolcapone on ATP levels and mitochondrial respiratory function in haplogroup H and J HepG2 cybrids. 2 f - accompanying analysis for Figure 7; The effect of bicalutamide upon ATP levels and mitochondrial respiratory function in haplogroup H and J HepG2 cybrids. 2 g - accompanying analysis for Figure 8; Figure 8 The effect of entacapone upon ATP levels and mitochondrial respiratory function in haplogroup H and J HepG2 transmitochondrial cybrids. * denotes unit of %. [file elife-78187-supp2.xlsx]

## Sheet:  2a (Figure 2)
Figure	Parameter	Haplogroup comparison	Mean difference (pmol/min/µg protein)	95% mean difference confidence interval		P-value
				Lower limit	Upper limit
2A	ATP-linked respiration	J vs H	-0.65	-2.88	1.58	0.5483
2A	Basal respiration	J vs H	-0.45	-2.67	1.78	0.6791
2A	Maximal respiration	J vs H	-0.36	-2.59	1.86	0.7365
2A	Proton leak	J vs H	0.31	-1.92	2.54	0.7732
2A	Spare respiratory capacity	J vs H	-0.47	-2.7	1.75	0.6606
2B	I	J vs H	2.46	0.4	4.53	0.0211
2B	II	J vs H	2.97	0.9	5.04	0.0064
2B	III	J vs H	0.92	-1.15	2.99	0.3695
2B	IV	J vs H	1.34	-0.72	3.41	0.1941

## Sheet: 2b (Figure 3)
Figure	Parameter	Haplogroup comparison	Mean difference (pmol/min/µg protein)	95% mean difference confidence interval		P-value
				Lower limit	Upper limit
3A	ATP relative to vehicle	J vs H	-3.12*	-31.49	25.24	0.813
3B	Basal respiration	J vs H	1.42	-1.92	4.77	0.3567
3C	Maximal respiration	J vs H	0.38	-2.82	3.58	0.7918
3D	ATP-linked respiration	J vs H	-0.31	-1.58	0.96	0.5992
3E	Spare respiratory capacity	J vs H	-1.37	-2.83	0.09	0.0631
3F	Proton leak	J vs H	1.29	0.3	2.27	0.0162

## Sheet: 2c (Figure 4)
Figure	Parameter	Haplogroup comparison	Mean difference (pmol/min/µg protein)	95% mean difference confidence interval		P-value
				Lower limit	Upper limit
4A	ATP relative to vehicle	J vs H	0.99*	-8.12	10.1	0.8217
4B	Basal respiration	J vs H	2.43	-0.68	5.53	0.1094
4C	Maximal respiration	J vs H	2.33	-0.44	5.09	0.0886
4D	ATP-linked respiration	J vs H	-1.13	-2.02	-0.25	0.017
4E	Spare respiratory capacity	J vs H	-1.74	-3.22	-0.25	0.0267
4F	Proton leak	J vs H	0.12	-0.35	0.59	0.5744

## Sheet: 2d (Figure 5)
Figure	Treatment	Parameter	Haplogroup comparison	Mean difference (pmol/min/µg protein)	95% mean difference confidence interval		P-value
					Lower limit	Upper limit
5A	Flutamide	Complex I activity	J vs H	2.15	0.42	3.89	0.0206
5B	Flutamide	Complex II activity	J vs H	1.23	-0.01	2.47	0.0517
5C	2-hydroxyflutamide	Complex III activity	J vs H	2.81	0.5	5.13	0.0228
5D	2-hydroxyflutamide	Complex IV activity	J vs H	1.2	-0.33	2.73	0.1108

## Sheet: 2e (Figure 6)
Figure	Parameter	Haplogroup comparison	Mean difference (pmol/min/µg protein)	95% mean difference confidence interval		P-value
				Lower limit	Upper limit
6A	ATP relative to vehicle	J vs H	-29.46	-50.83	-8.09	0.012
6B	Basal respiration	J vs H	0.49	-1.7	2.68	0.6386
6C	Maximal respiration	J vs H	1.37	-1.71	4.45	0.3421
6D	ATP-linked respiration	J vs H	0.54	-1.27	2.34	0.5162
6E	Spare respiratory capacity	J vs H	-0.01	-0.42	0.41	0.9616
6F	Proton leak	J vs H	0.59	-0.64	1.81	0.3351

## Sheet: 2f (Figure 7)
Figure	Parameter	Haplogroup comparison	Mean difference (pmol/min/µg protein)	95% mean difference confidence interval		P-value
				Lower limit	Upper limit
7A	ATP relative to vehicle	J vs H	-1.61*	-22.03	18.81	0.8622
7B	Basal respiration	J vs H	1.91	-0.35	4.16	0.0878
7C	Maximal respiration	J vs H	-0.27	-3.22	2.68	0.8371
7D	ATP-linked respiration	J vs H	0.12	-1.48	1.72	0.8701
7E	Spare respiratory capacity	J vs H	0.07	-1.29	1.44	0.9042
7F	Proton leak	J vs H	0.36	-0.01	0.72	0.0533

## Sheet: 2g (Figure 8)
Figure	Parameter	Haplogroup comparison	Mean difference (pmol/min/µg protein)	95% mean difference confidence interval		P-value
				Lower limit	Upper limit
8A	ATP relative to vehicle	J vs H	-5.26*	-18.33	7.81	0.3941
8B	Basal respiration	J vs H	-0.75	-2.2	0.7	0.2864
8C	Maximal respiration	J vs H	1.63	-2.84	6.1	0.4267
8D	ATP-linked respiration	J vs H	-1.42	-2.92	0.08	0.0612
8E	Spare respiratory capacity	J vs H	-1.5	-2.79	-0.21	0.0267
8F	Proton leak	J vs H	0.24	-1.47	1.94	0.7707
